# Supplementary material
Source: PubMed Central journal article supplement (PMC5785237)

## Supplemental Figure Legends

Supplemental Figure 1. Article Selection from the Literature Search – Chronic Low Back Pain. NSAIDs: Non-Steroidal Anti-Inflammatory Drugs; NMDA: N-Methyl-D-aspartate

Supplemental Figure 2: Article Selection from the Literature Search – Myofascial Pain Syndrome. NSAIDs: Non-Steroidal Anti-Inflammatory Drugs

Supplemental Figure 3: Article Selection from the Literature Search – Fibromyalgia. NSAIDs: Non-Steroidal Anti-Inflammatory Drugs; NMDA: N-Methyl-D-aspartic acid

Supplemental Figure 4: Article Selection from the Literature Search – Post-herpetic Neuralgia. NMDA: N-Methyl-D-aspartic acid; NSAIDs: Non-Steroidal Anti-Inflammatory Drugs

Supplemental Figure 5: Article Selection from the Literature Search – Painful Diabetic Neuropathy. NMDA: N-Methyl-D-aspartic acid

Supplemental Figure 6: Article Selection from the Literature Search – Radicular Pain. NSAIDs: Non-Steroidal Anti-Inflammatory Drugs

Supplemental Figure 7: Article Selection from the Literature Search – Complex Regional Pain Syndrome. DMSO: Dimethylsulfoxide; TNF: Tumor Necrosis Factor

Supplemental Figure 1

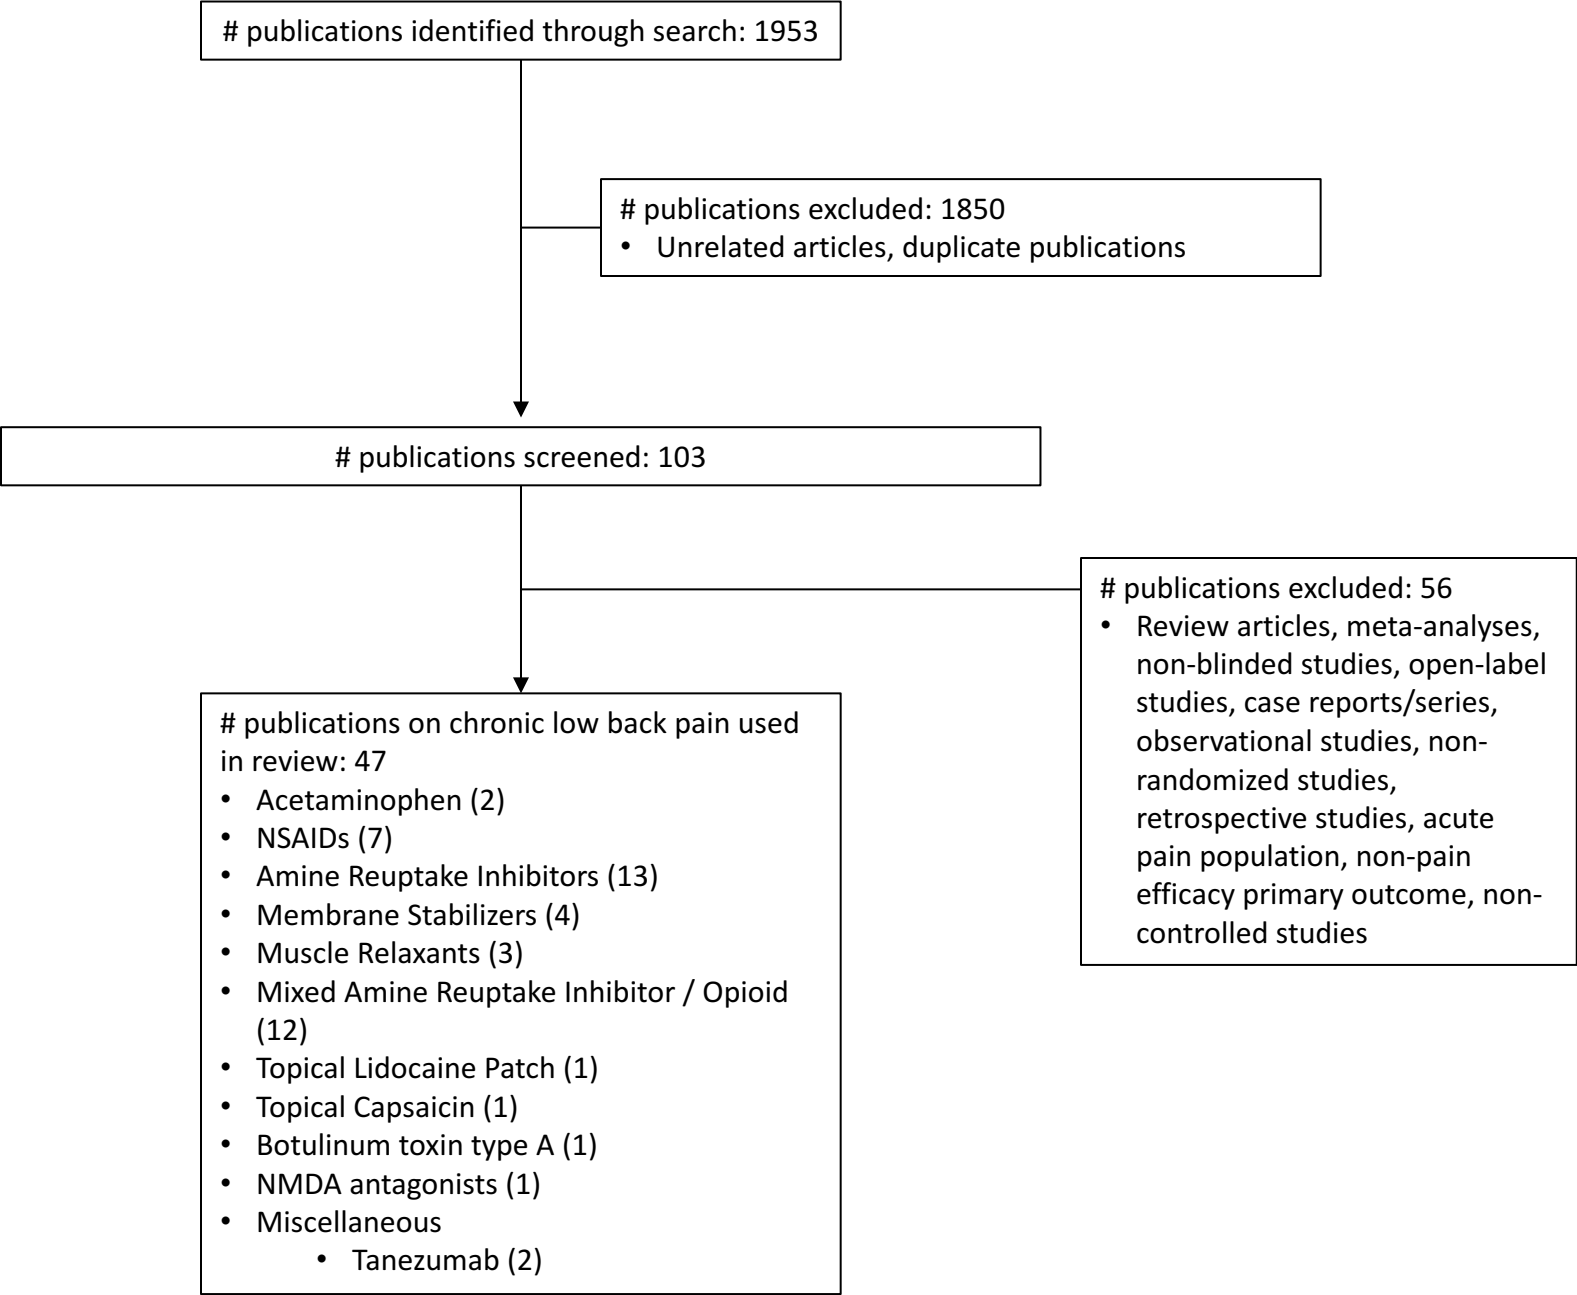

Supplemental Figure 2

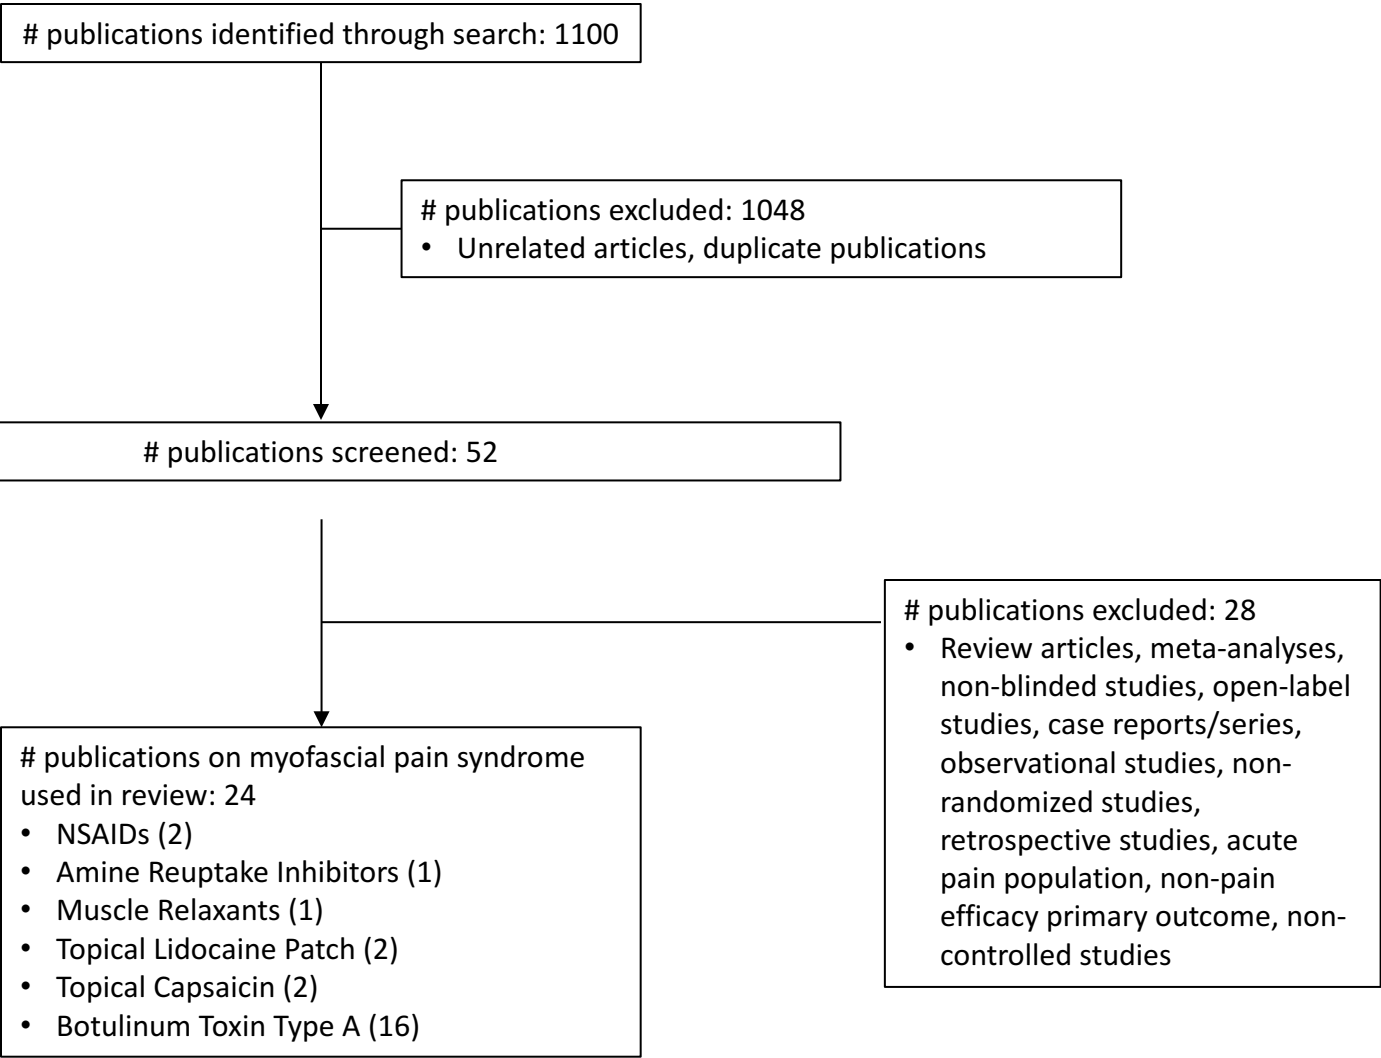

Supplemental Figure 3

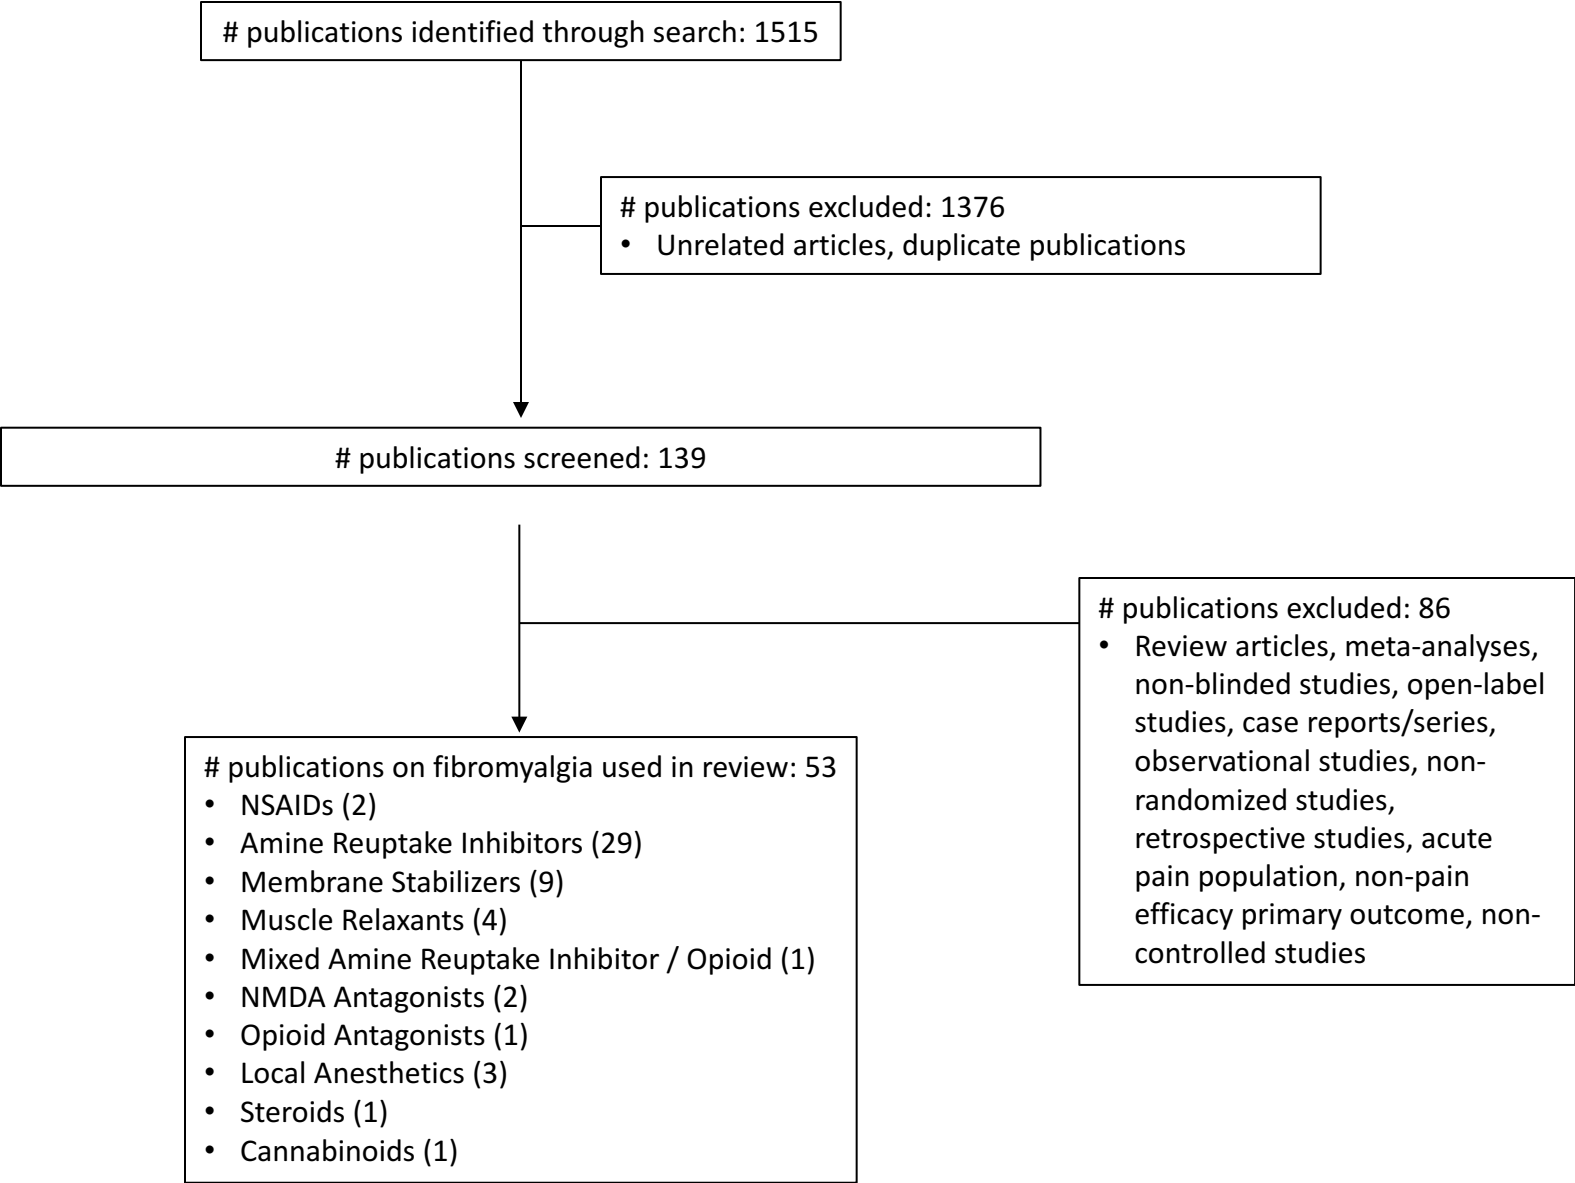

Supplemental Figure 4

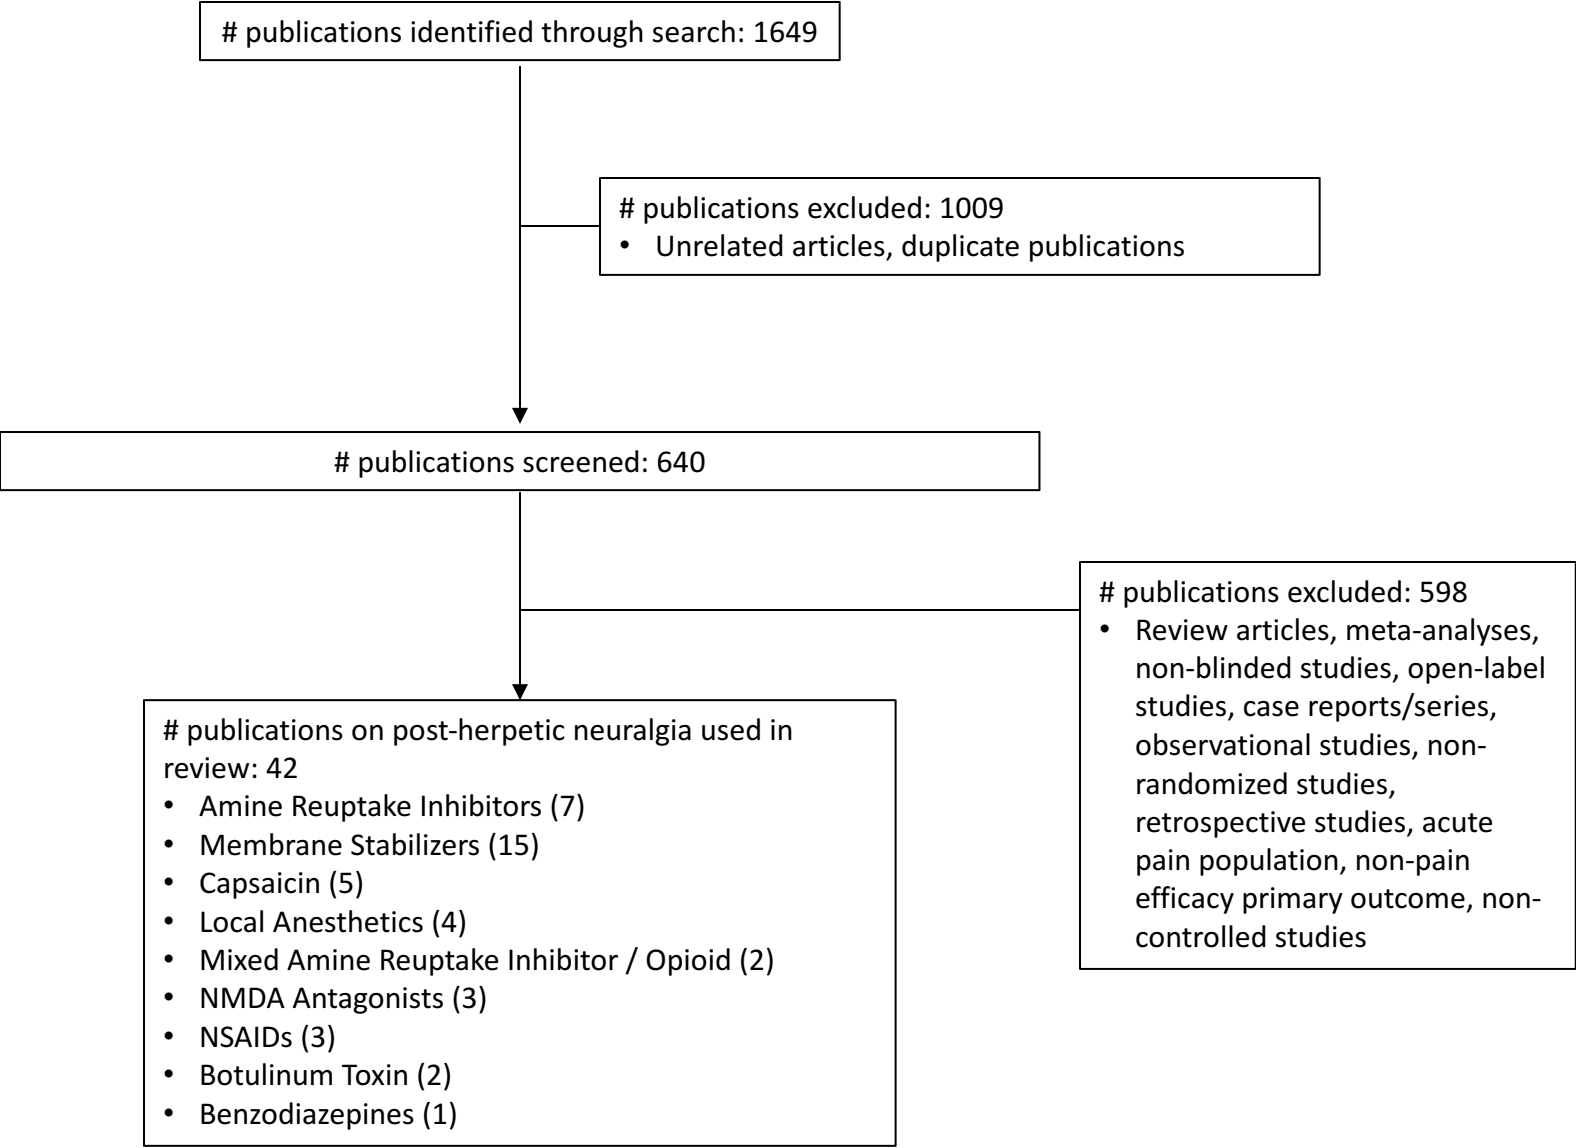

Supplemental Figure 5

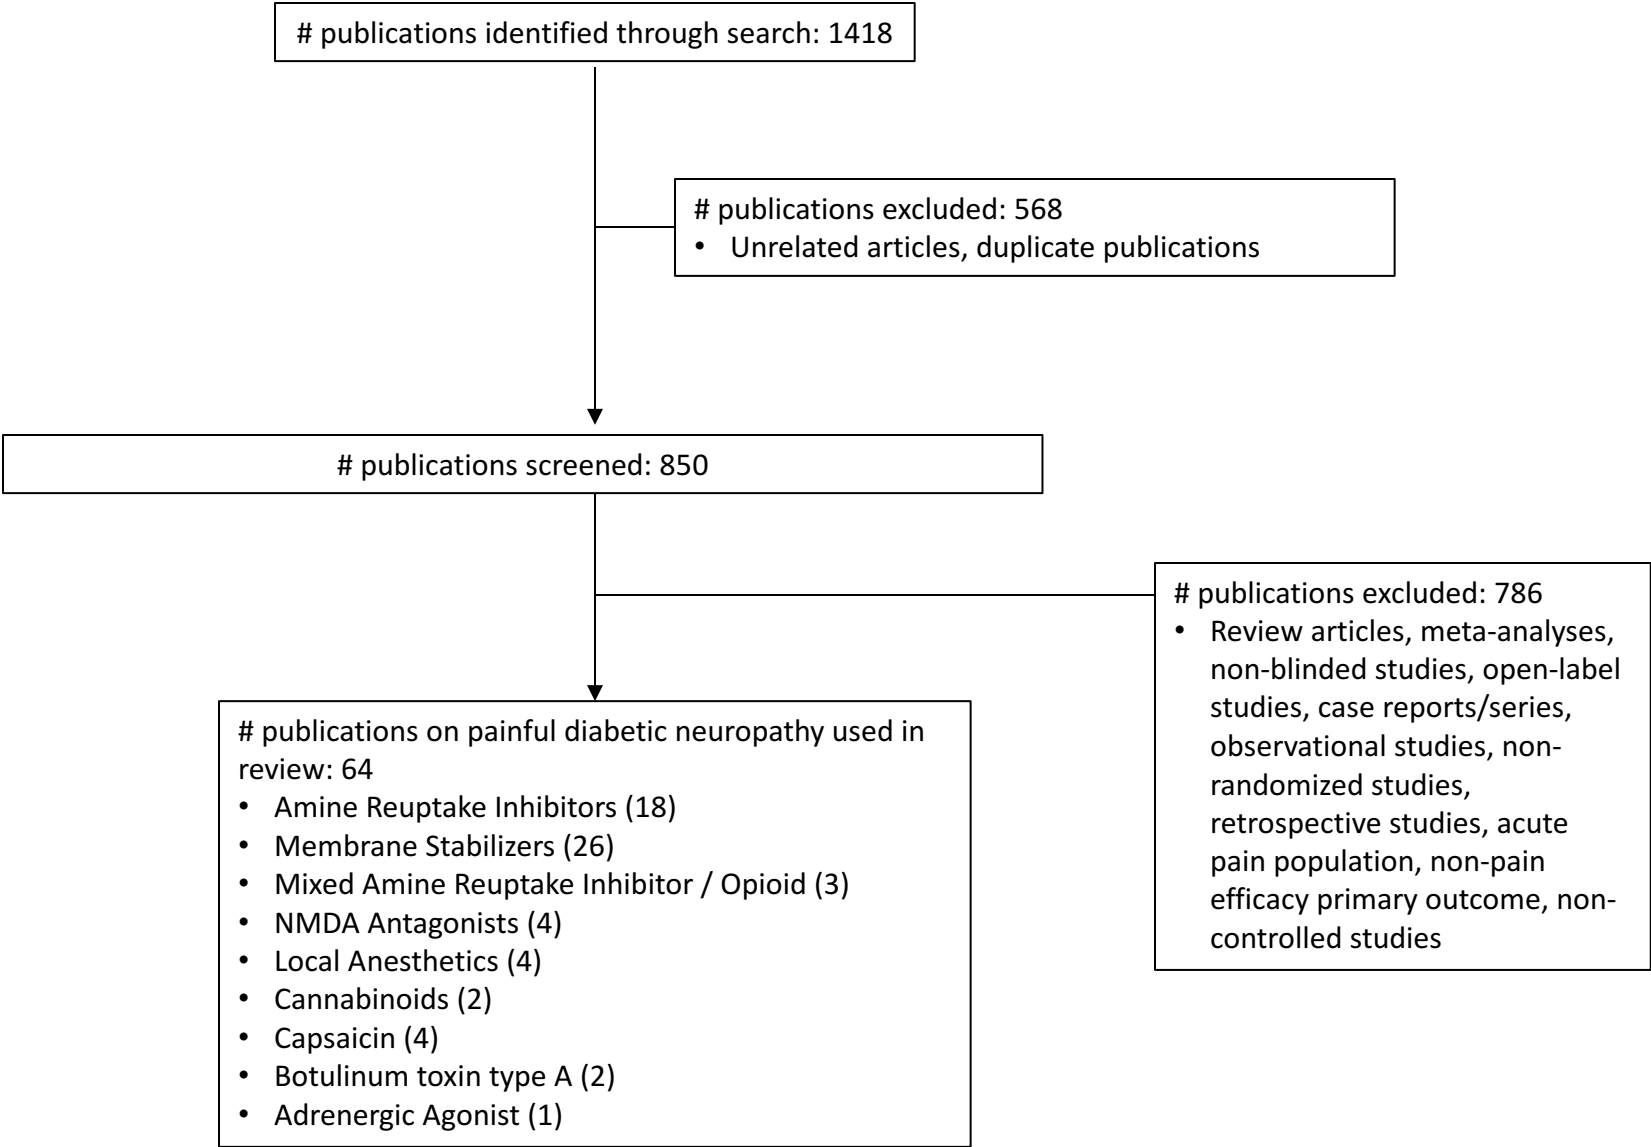

Supplemental Figure 6

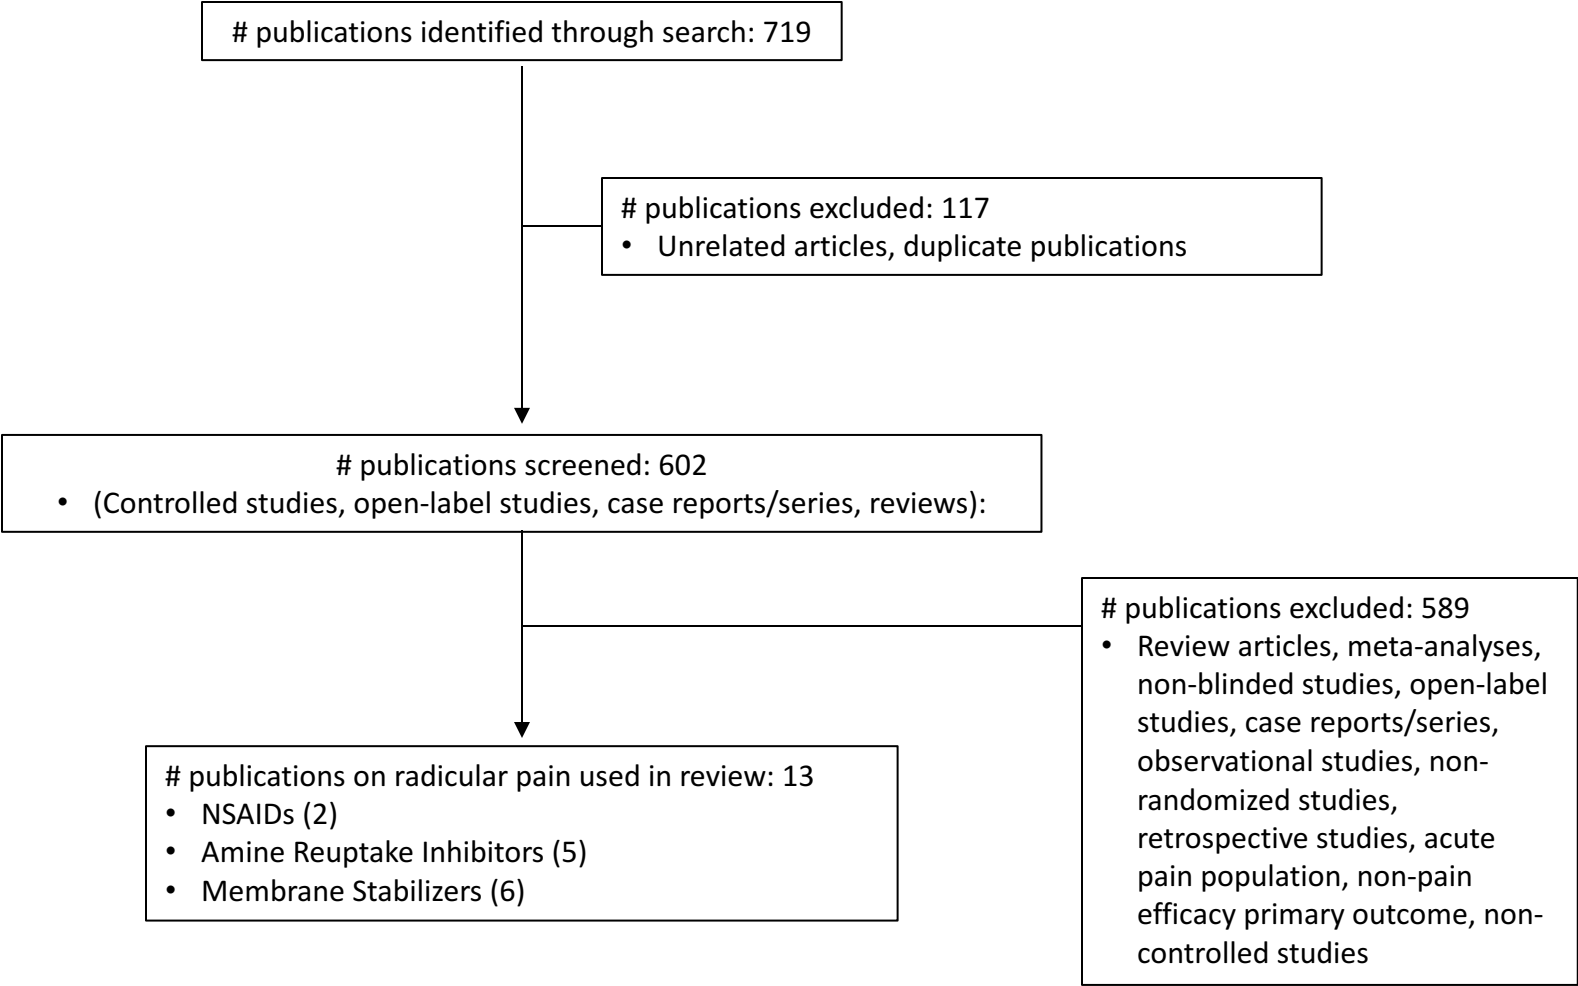

Supplemental Figure 7

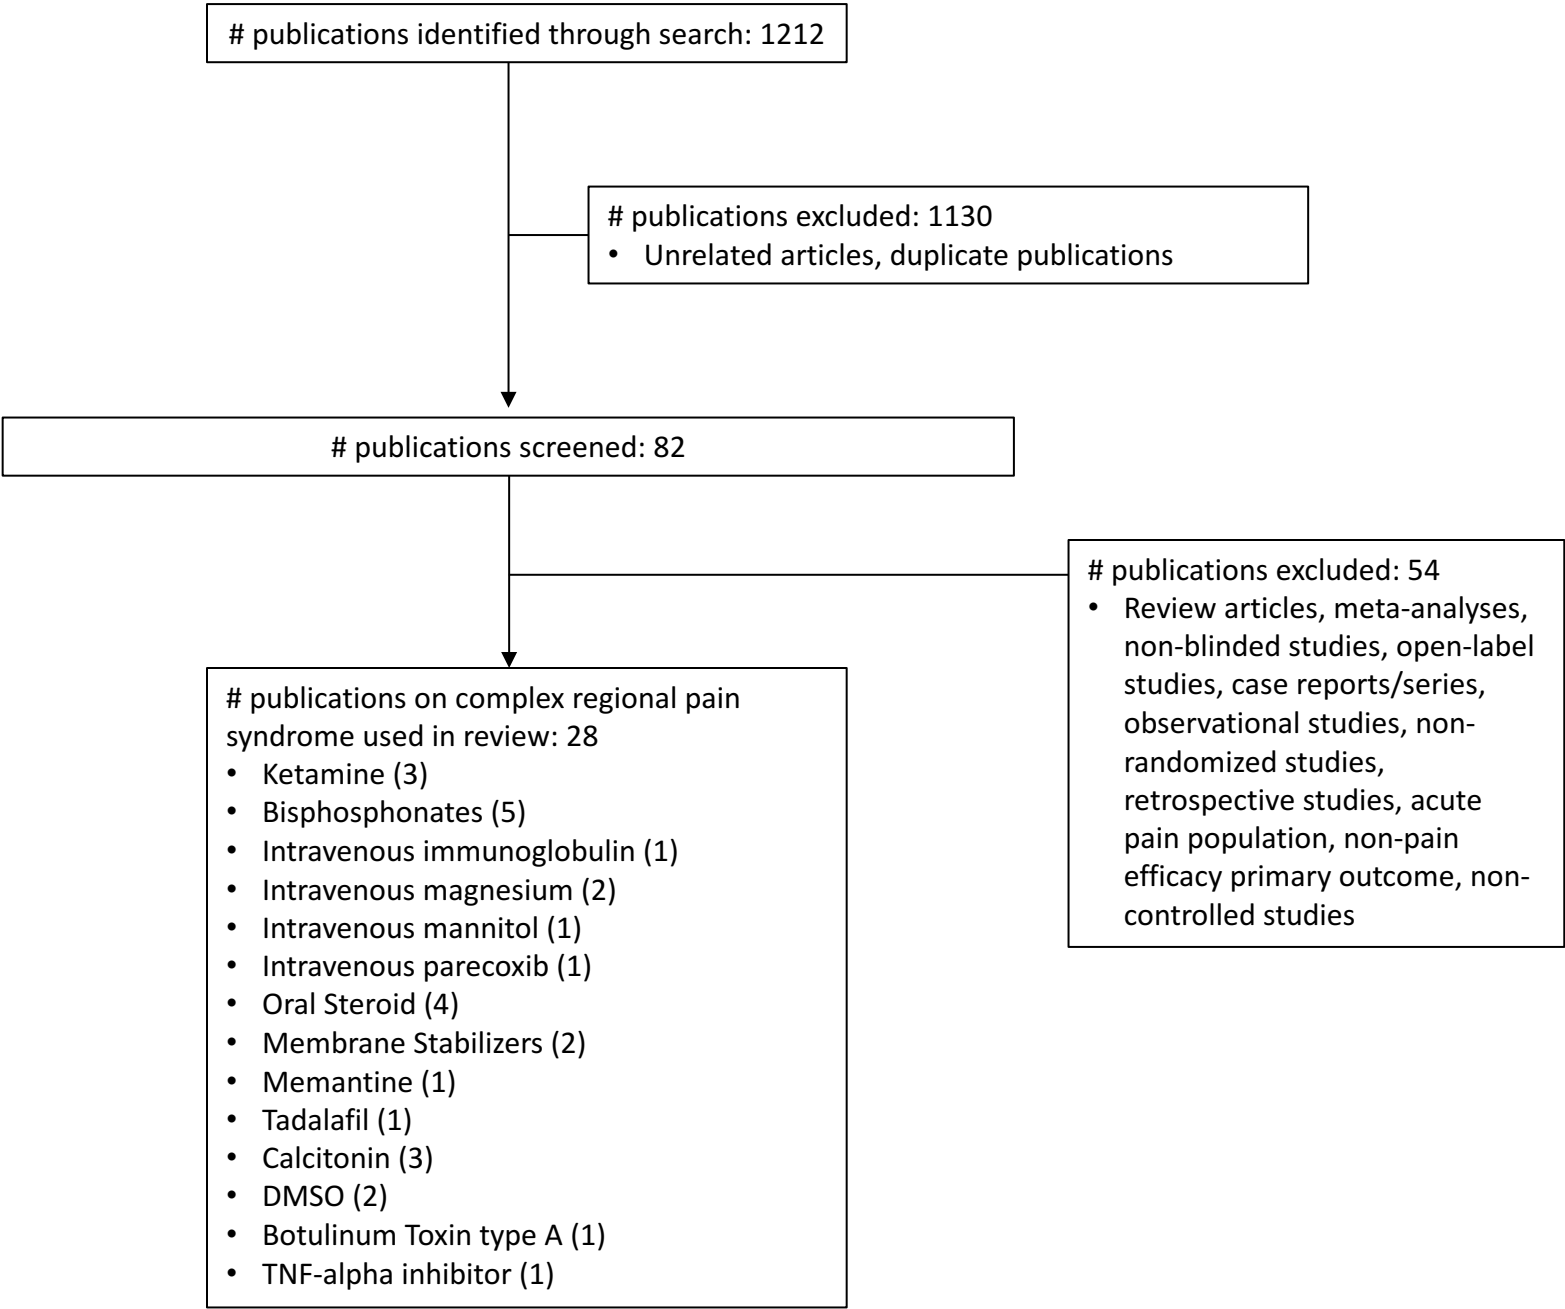

Supplement: NIHMS935254-supplement-Supplemental_Figures_1-7.pdf [file NIHMS935254-supplement-Supplemental_Figures_1-7.pdf]
